# Supplementary material
Source: PubMed Central journal article supplement (PMC3227129)

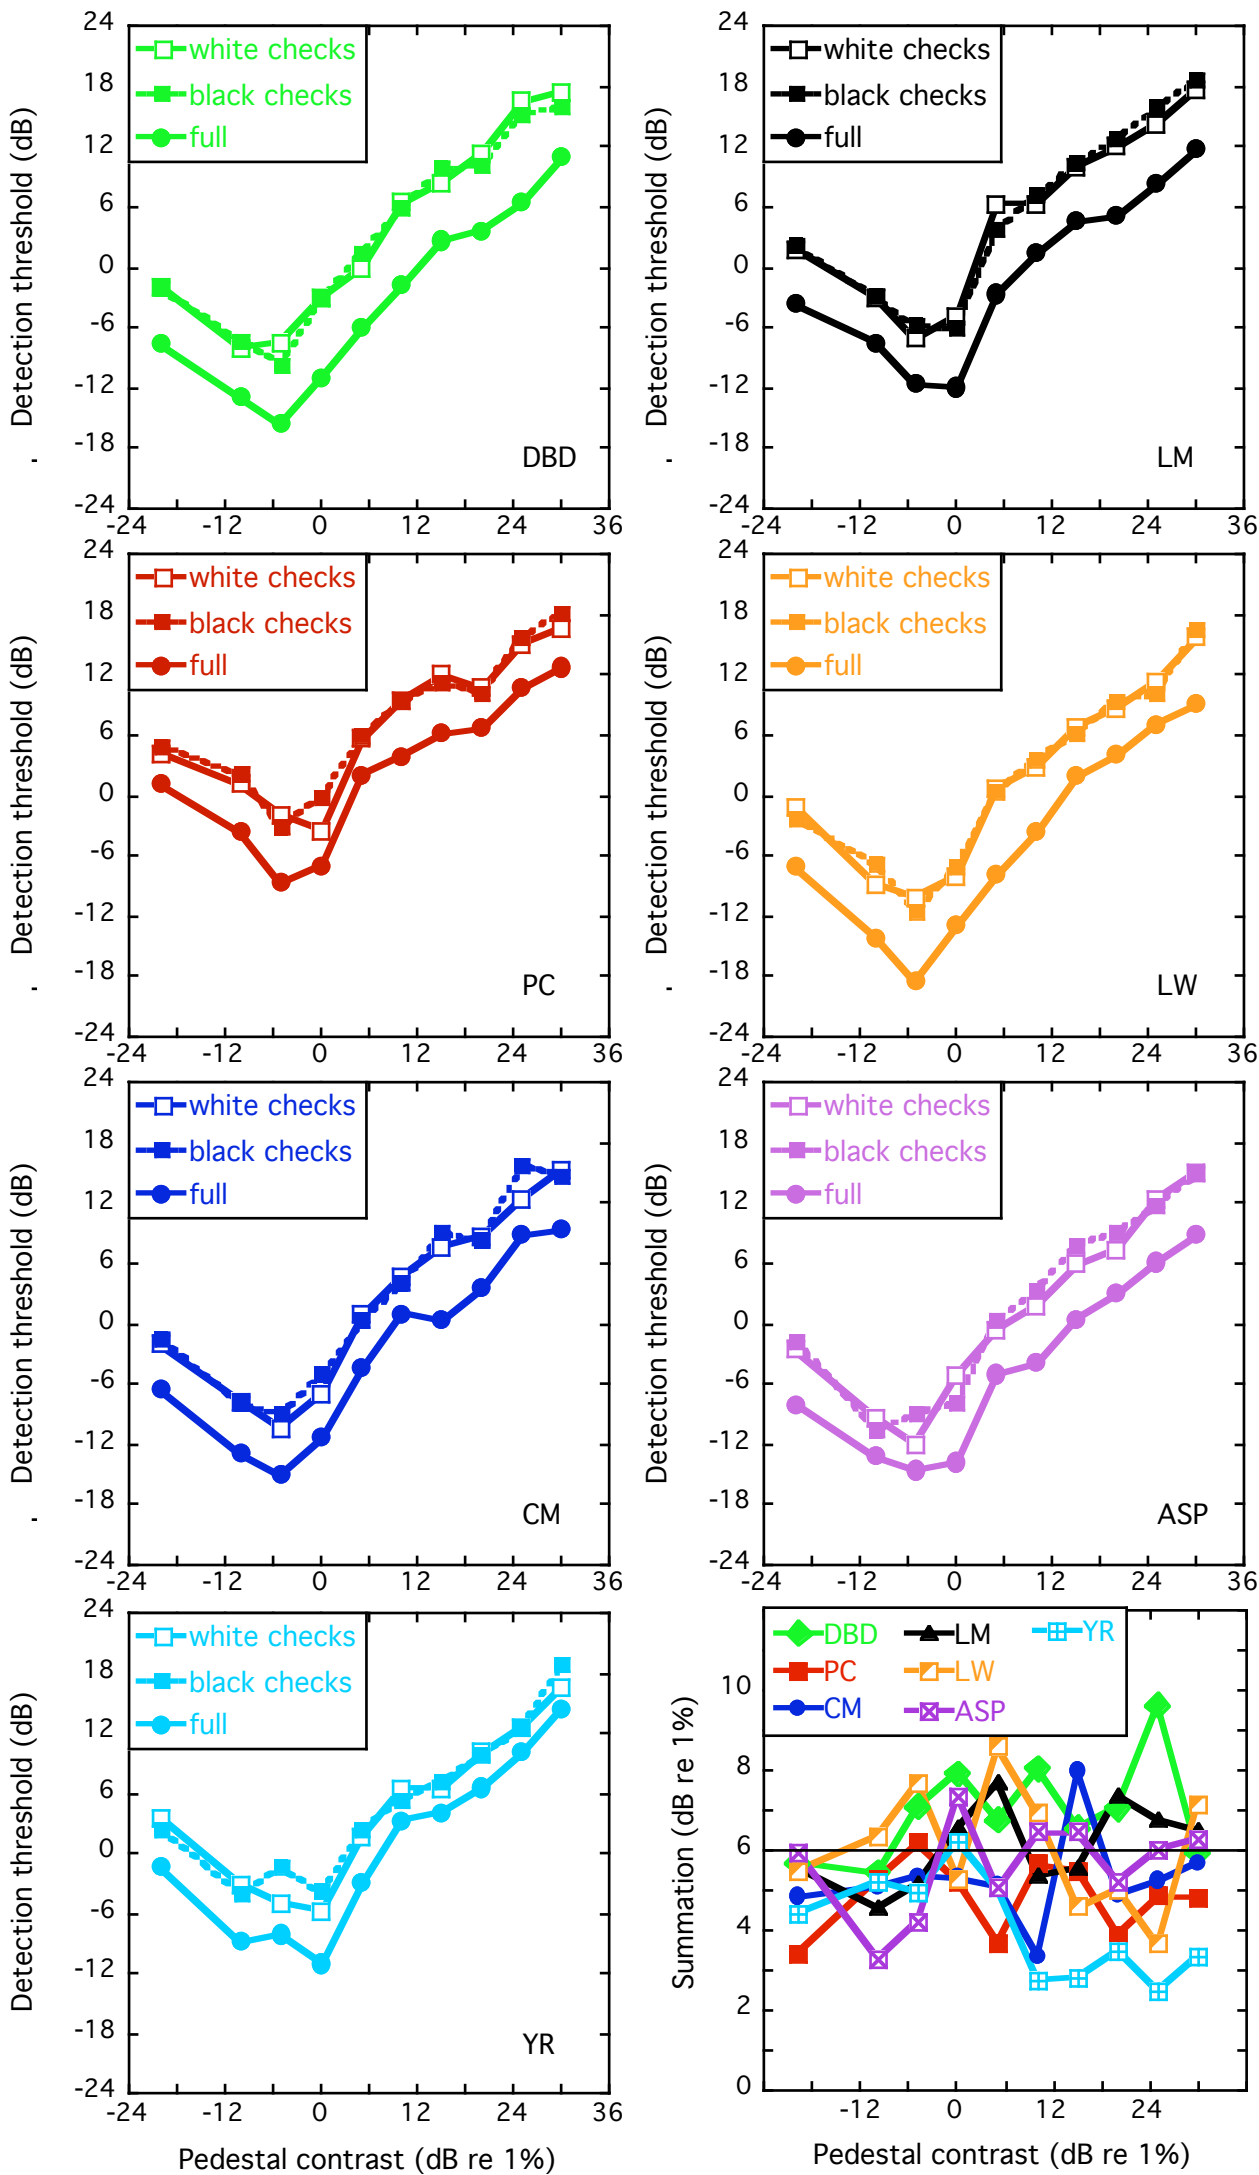

Supplement: rspb20070957s21.pdf [file rspb20070957s21.pdf]
